# Supplementary material for: Controllable synthesis of functionalized ordered mesoporous silica by metal-based ionic liquids, and their effective adsorption of dibenzothiophene
Source: Royal Society of Chemistry journal article supplement (doi:10.1039/c4ra05260a), 2014-08-11
Supplement: c4ra05260a1.pdf [file c4ra05260a1.pdf]

## Supporting Information

### **Controllable synthesis of functionalized ordered mesoporous silica by metal-based ionic liquids, and their effective adsorption of dibenzothiophene**

Jun Xiong,<sup>a</sup> Wenshuai Zhu,<sup>\*a</sup> Wenjing Ding,<sup>a</sup> Peng Wang,<sup>a</sup> Yanhong Chao,<sup>b</sup> Ming Zhang,<sup>a,c</sup> Fengxia Zhu,<sup>a</sup> and Huaming Li<sup>\*a</sup>

<sup>a</sup> *School of Chemistry and Chemical Engineering, Jiangsu University, Zhenjiang 212013, P. R. China*

<sup>b</sup> *School of Pharmacy, Jiangsu University, Zhenjiang 212013, P. R. China*

<sup>c</sup> *Energy and Powder Engineering, Jiangsu University, Zhenjiang 212013, P. R. China*

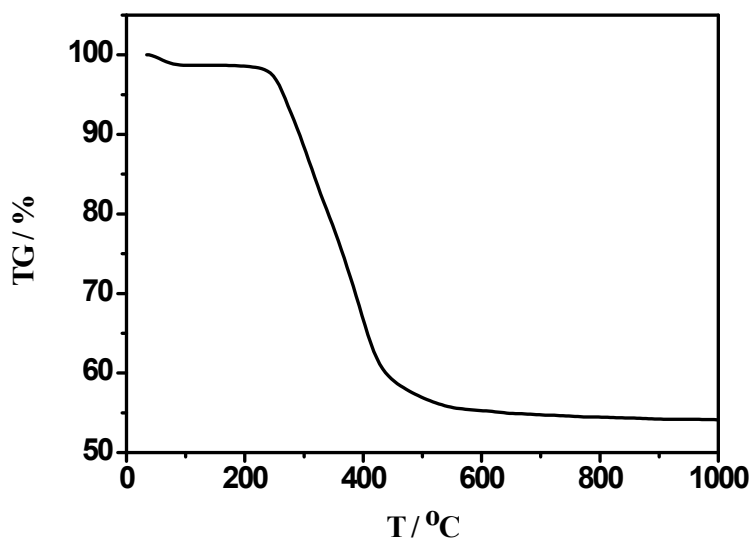

Fig S1. TG of meso-Cu/SiO<sub>2</sub>(Cu-IL<sub>1</sub>) before thermal treatment.

The sample meso-Cu/SiO<sub>2</sub>(Cu-IL<sub>1</sub>) before thermal treatment was analyzed by thermogravimetric (TG). This process was performed in N<sub>2</sub> atmosphere. As showed in Fig S1, the weight loss between room temperature and 100°C is only 1.39%, which due to the small amount of physisorbed water. It can be seen that there is a large weight loss of 43.36 % between 220 and 550°C. This is caused by combustion and decomposition of the alkyl chains of imidazolium cation of ionic liquid. It can be found that there is no mass loss after 550°C, which indicated the organic part had been removed after 550°C.

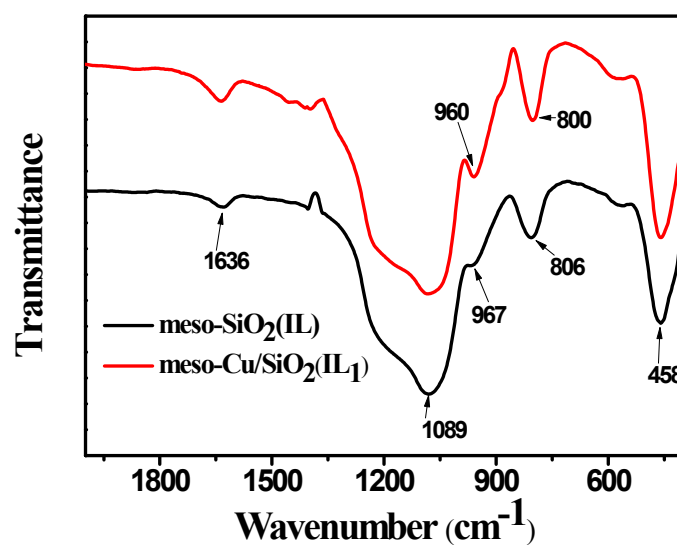

Fig. S2. The FT-IR spectra of meso/SiO<sub>2</sub>(IL) and meso-Cu/SiO<sub>2</sub>(Cu-IL<sub>1</sub>)

Some others FT-IR bands were analyzed. The band at 1636 cm<sup>-1</sup> is the bending of the O-H.[1] The band at 1089 cm<sup>-1</sup> is the asymmetric stretch of Si-O-Si bonds. And the band at 458 cm<sup>-1</sup> is attributed to the Si-O bending vibration.[2] The result indicated that they are not related to some carbon-oxygen and / or carbon-nitrogen-based vibration modes.

[1] L. C. Fonseca, R. Faez, F. F. Camilo, M. A. Bizeto, *Micropor Mesopor Mater.*, 2012, **159**, 24-29.

[2] X.C. Shao, X.T. Zhang, W.G. Yu, Y.Y. Wu, Y.C. Qin, Z.L. Sun, L.J. Song, *Appl. Surf. Sci.*, 2012, **263**, 1-7.

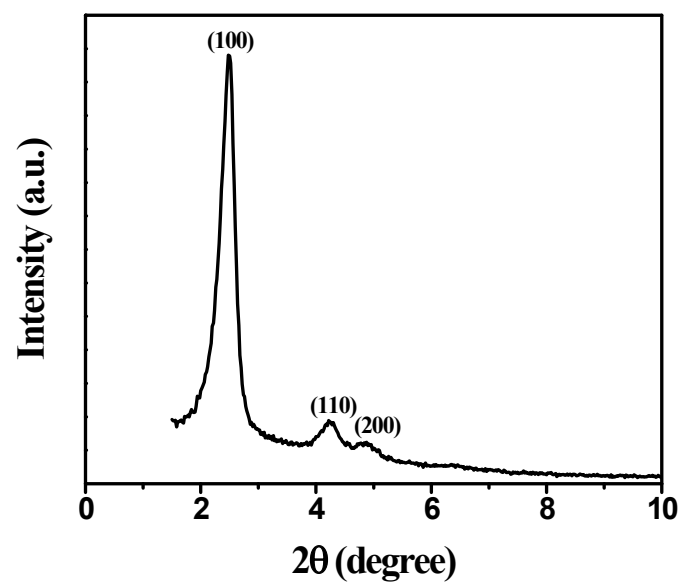

**Fig. S3.** The low-angle XRD of meso-Cu/SiO<sub>2</sub>(Cu-IL<sub>2</sub>)

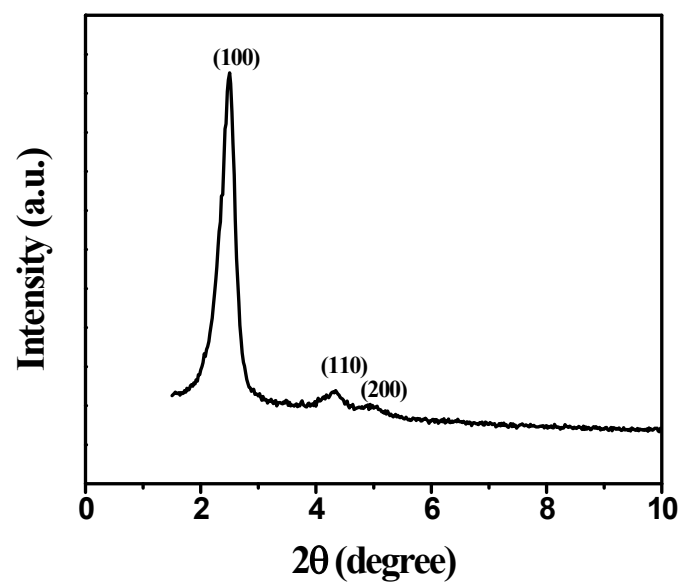

Fig. S4. The low-angle XRD of meso-Fe/SiO<sub>2</sub>(Fe-IL)

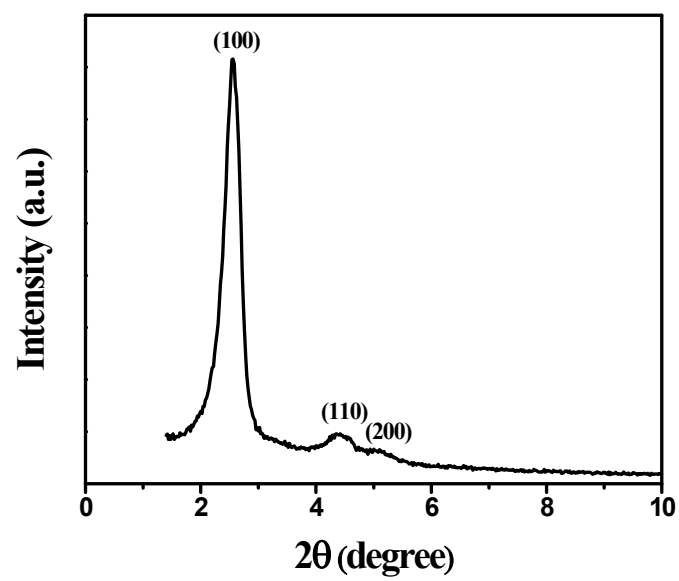

Fig. S5. The low-angle XRD of meso-Mn/SiO<sub>2</sub>(Mn-IL)

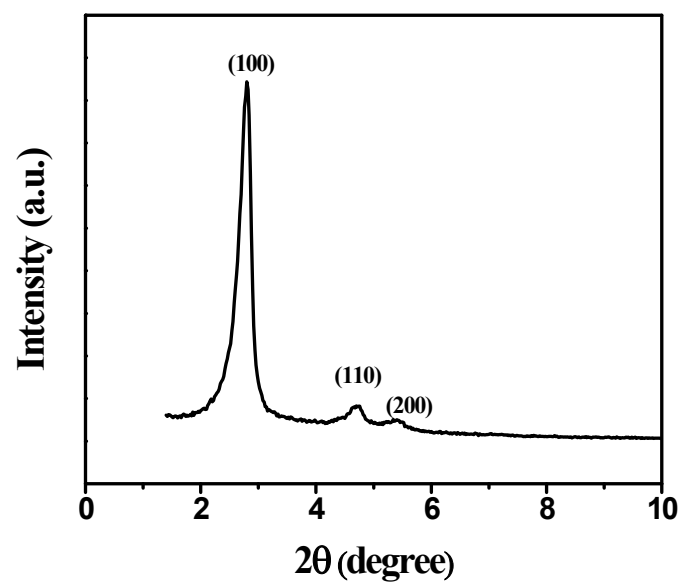

Fig. S6. The low-angle XRD of meso-Ni/SiO<sub>2</sub>(Ni-IL)

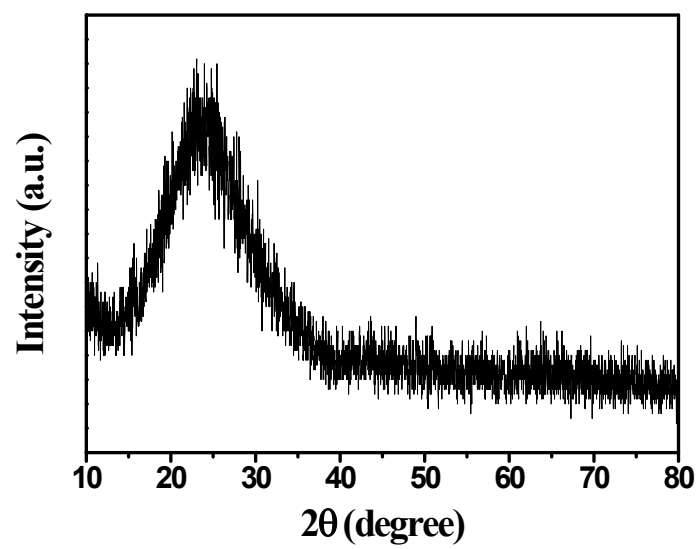

Fig. S7. The wide-angle XRD of meso-Cu/SiO<sub>2</sub>(Cu-IL<sub>2</sub>)



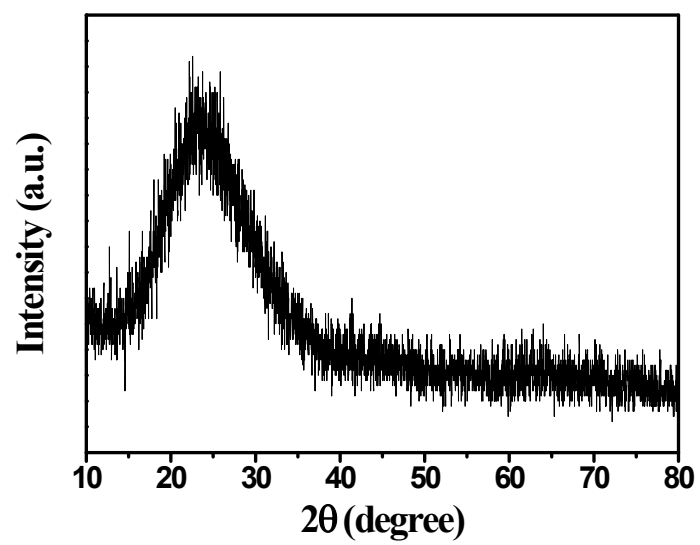

**Fig. S8.** The wide-angle XRD of meso-Fe/SiO<sub>2</sub>(Fe-IL)

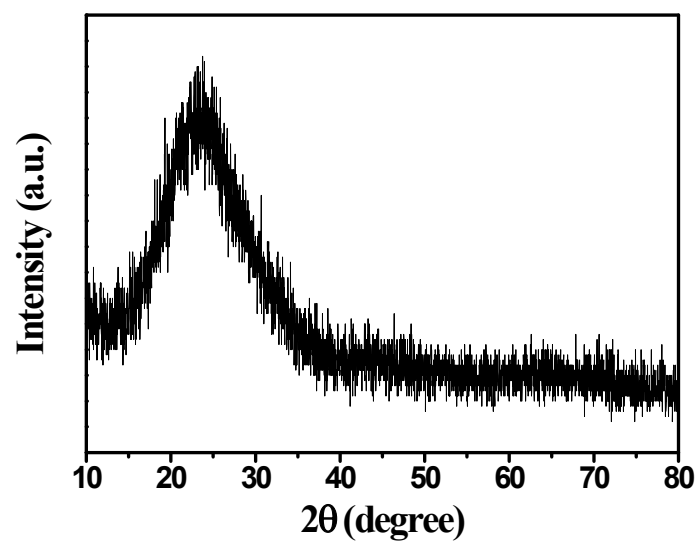

Fig. S9. The wide-angle XRD of meso-Mn/SiO<sub>2</sub>(Mn-IL)

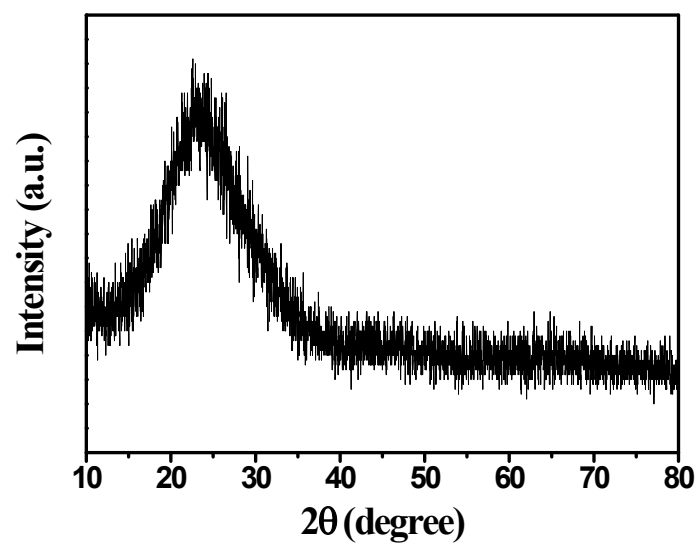

**Fig. S10.** The wide-angle XRD of meso-Ni/SiO<sub>2</sub>(Ni-IL)

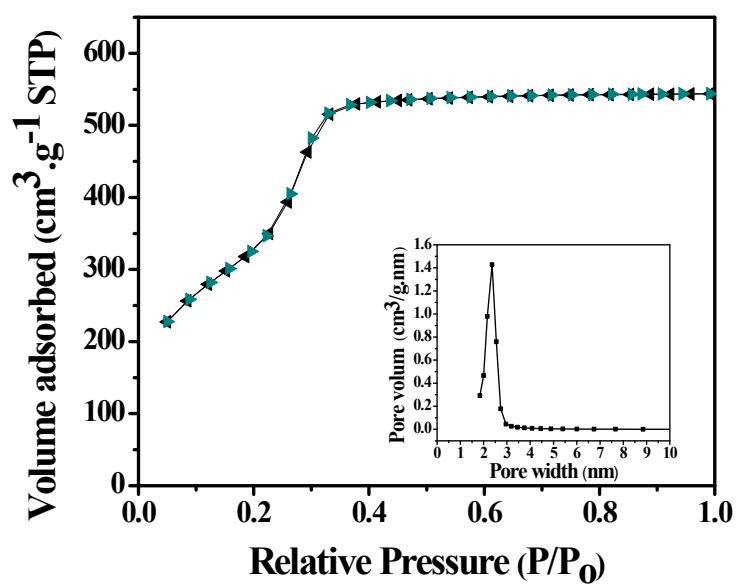

Fig. S11. N<sub>2</sub> adsorption-desorption isotherms and pore size distribution (the inset) of meso-Cu/SiO<sub>2</sub>(Cu-IL<sub>2</sub>)

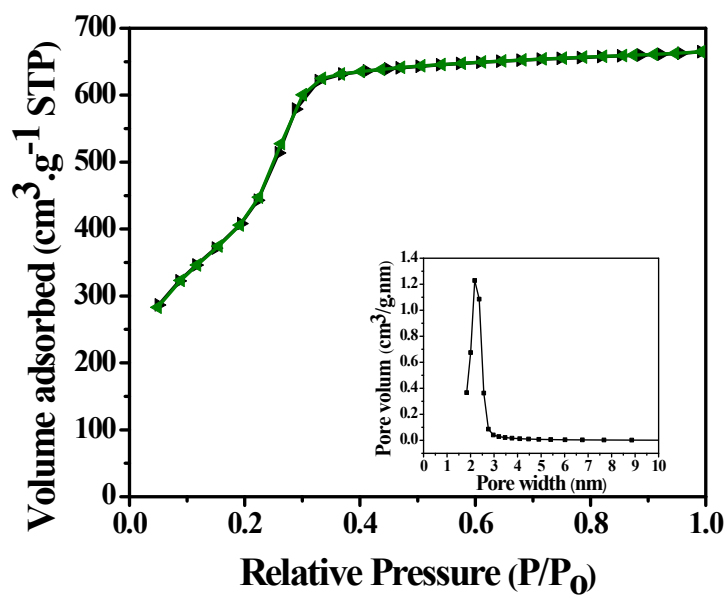

Fig. S12. N<sub>2</sub> adsorption-desorption isotherms and pore size distribution (the inset) of meso-Fe/SiO<sub>2</sub>(Fe-IL)

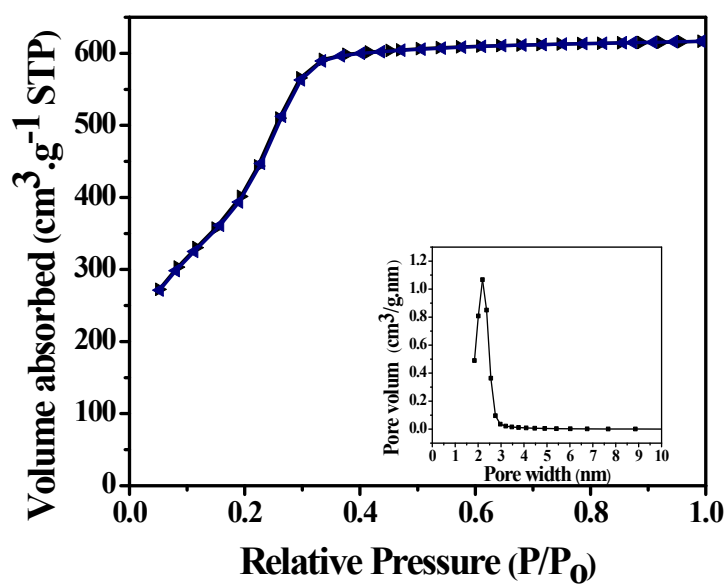

Fig. S13. N<sub>2</sub> adsorption-desorption isotherms and pore size distribution (the inset) of meso-Mn/SiO<sub>2</sub>(Mn-IL)

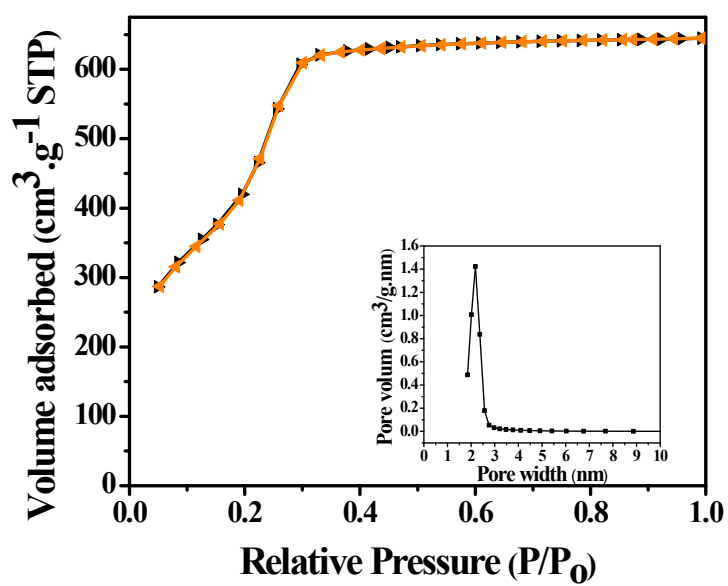

Fig. S14. N<sub>2</sub> adsorption-desorption isotherms and pore size distribution (the inset) of meso-Ni/SiO<sub>2</sub>(Ni-IL)

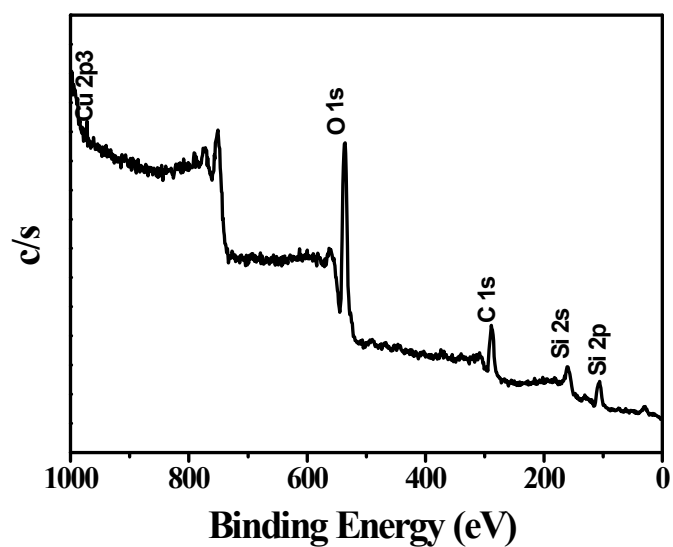

**Fig. S15.** XPS spectrum of meso-Cu/SiO<sub>2</sub>(Cu-IL<sub>1</sub>)

The survey XPS spectrum shows that the main elements on the surface of the product are Cu, O, Si and C. The C came from the adventitious carbon to correct for specimen. No N element was found, which implied the imidazolium cation of ionic liquid has been removed.



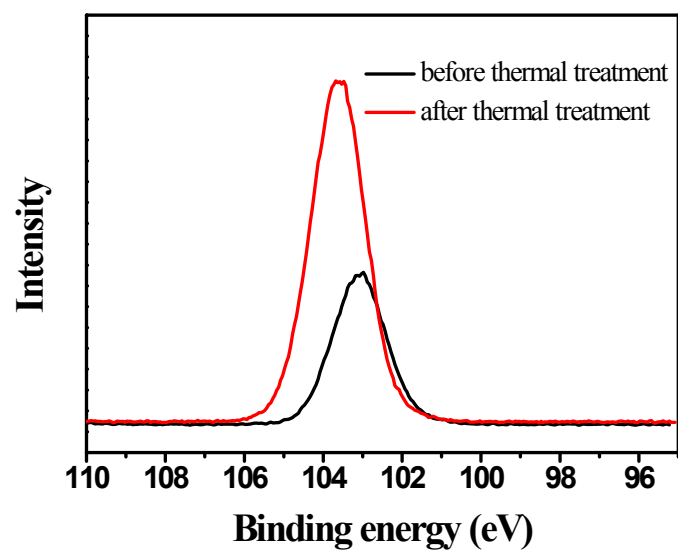

**Fig.S16.** XPS measurement for Si 2s level of meso-Cu/SiO<sub>2</sub>(Cu-IL<sub>1</sub>).

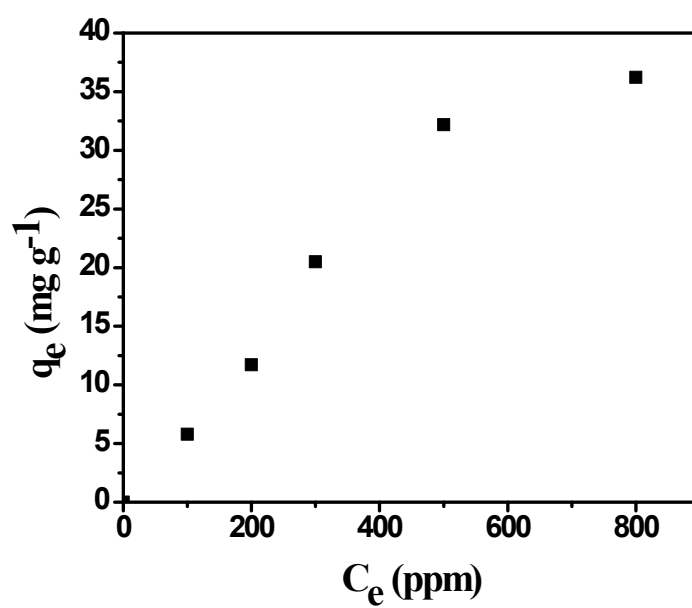

Fig. S17. Adsorption isotherms of DBT at 25°C on meso-Cu/SiO<sub>2</sub>(Cu-IL<sub>1</sub>)

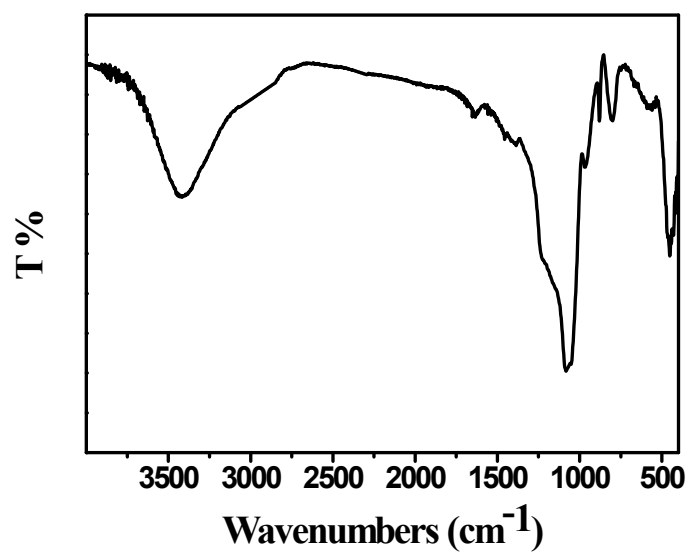

**Fig. S18.** The FT-IR spectra of meso-Cu/SiO<sub>2</sub>(Cu-IL<sub>2</sub>)

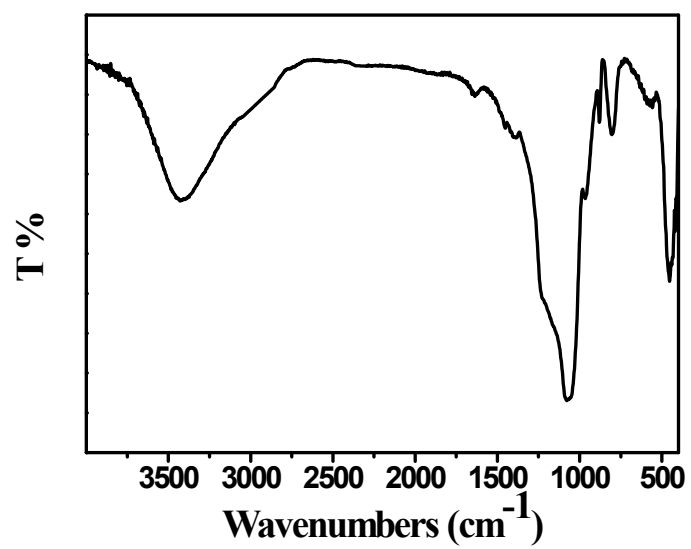

**Fig. S19.** The FT-IR spectra of meso-Fe/SiO<sub>2</sub>(Fe-IL)

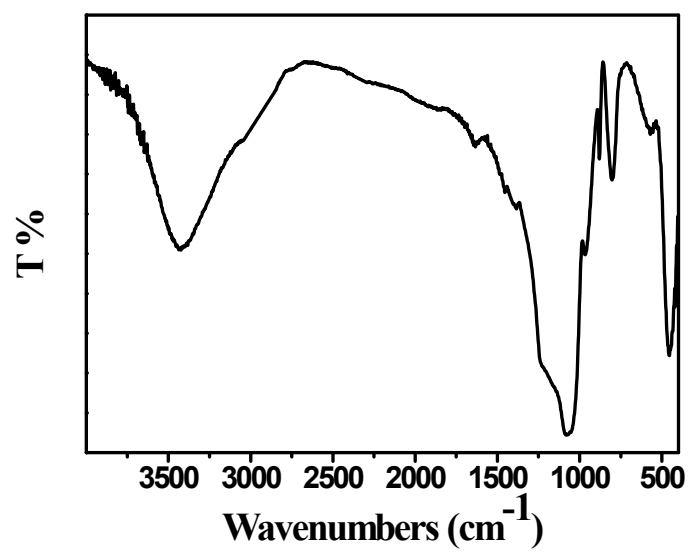

**Fig. S20.** The FT-IR spectra of meso-Mn/SiO<sub>2</sub>(Mn-IL)

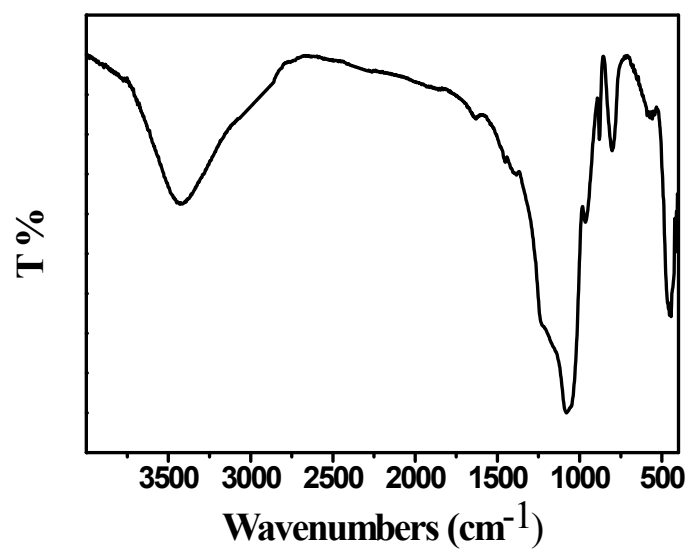

**Fig. S21.** The FT-IR spectra of meso-Ni/SiO<sub>2</sub>(Ni-IL)

**Table S1** The elemental compositions of different samples

| Sample                                         | N (%) <sup>a</sup> | C (%) <sup>a</sup> | Metal/Si (%) <sup>b</sup> |
|------------------------------------------------|--------------------|--------------------|---------------------------|
| meso-Cu/SiO <sub>2</sub> (Cu-IL <sub>1</sub> ) | 0                  | 0.33               | 1.44×10 <sup>-2</sup>     |
| meso-Cu/SiO <sub>2</sub> (Cu-IL <sub>2</sub> ) | 0                  | 0.077              | 6.94×10 <sup>-3</sup>     |
| meso-Fe/SiO <sub>2</sub> (Fe-IL)               | 0                  | 0.041              | 1.14×10 <sup>-2</sup>     |
| meso-Mn/SiO <sub>2</sub> (Mn-IL)               | 0                  | 0                  | 3.85×10 <sup>-3</sup>     |
| meso-Ni/SiO <sub>2</sub> (Ni-IL)               | 0                  | 0.089              | 1.02×10 <sup>-3</sup>     |
| meso-SiO <sub>2</sub> (IL)                     | 0                  | 0.33               | -                         |

<sup>a</sup> the data obtained by Elemental analysis, <sup>b</sup> obtained by ICP.

From the Table, it can be seen that the samples did not contain N elemental and hardly contained C elemental. So it can be concluded that the imidazolium rings were completely removed and the residual carbon was not present.

**Table S2** The 2-Theta values and the (hkl) reflection lines for each sample

| Sample                                         | 2-Theta |       |       |
|------------------------------------------------|---------|-------|-------|
|                                                | (100)   | (110) | (200) |
| meso-Cu/SiO <sub>2</sub> (Cu-IL <sub>1</sub> ) | 2.6     | 4.4   | 5.1   |
| meso-Cu/SiO <sub>2</sub> (Cu-IL <sub>2</sub> ) | 2.5     | 4.2   | 4.8   |
| meso-Fe/SiO <sub>2</sub> (Fe-IL)               | 2.5     | 4.3   | 5.0   |
| meso-Mn/SiO <sub>2</sub> (Mn-IL)               | 2.6     | 4.4   | 5.1   |
| meso-Ni/SiO <sub>2</sub> (Ni-IL)               | 2.8     | 4.7   | 5.4   |
